# Supplementary material
Source: Springer Nature journal article supplement (https://www.springermedizin.de/resource/supplementary/12933_2013_757_MOESM11_ESM.pdf/9538914)

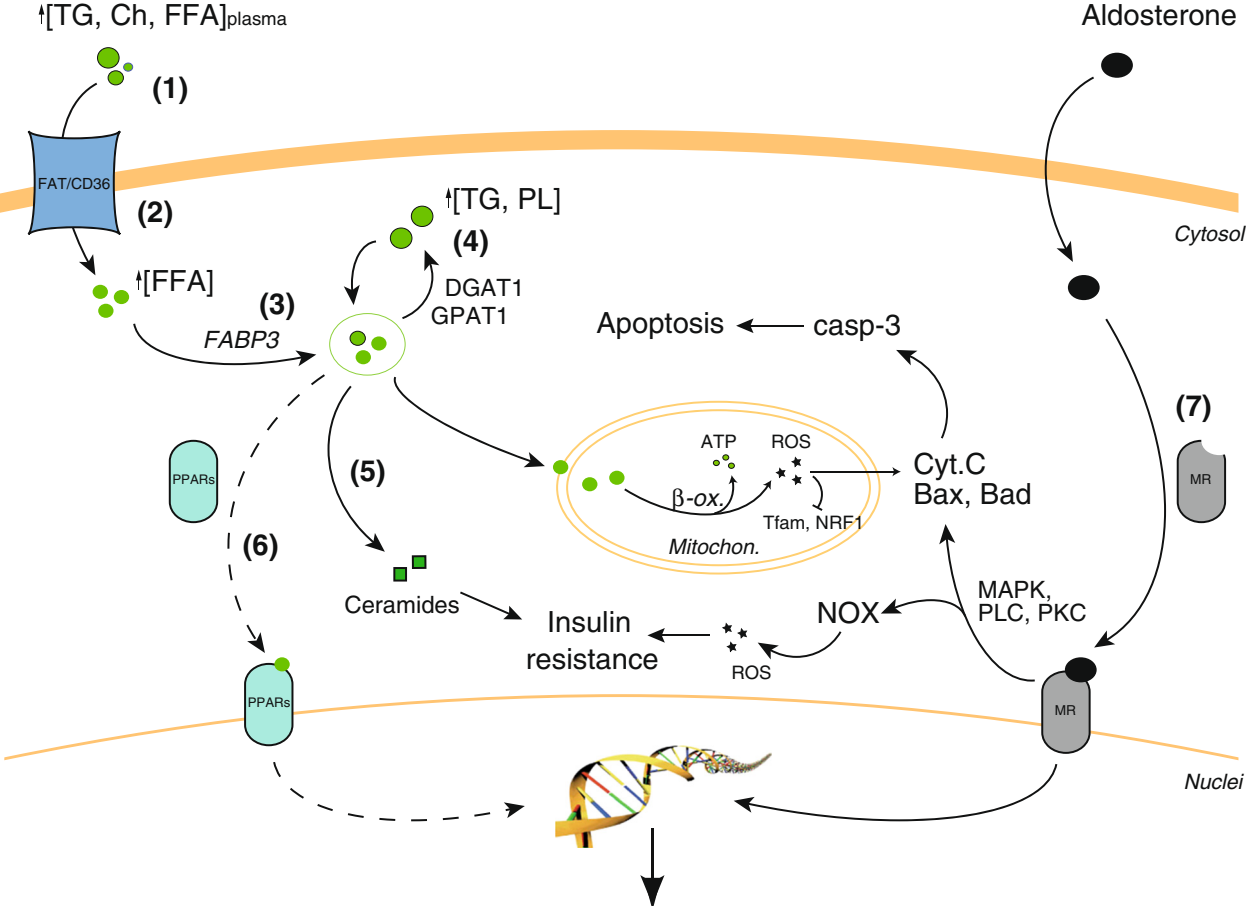

- . β-oxidation genes
- . FAT/CD36, FABP3

- . Na<sup>+</sup>/k<sup>+</sup> pumps, ICAM-1, TGFβ
- . Bax, p53, FasL

Supplement: MOESM11 [file 9538914]
